# Supplementary material
Source: Research Square preprint supplement (doi:10.21203/rs.3.rs-8687934/v1)
Supplement: Supplementary file 1 [file 84a1a6f70112d9966b2bc1ac.pdf]

**Online Resource 1 (Supplementary Table 1).** Positions of the most intense Raman peaks observed in the mean spectra of the non-diabetic Wistar rat's skin at the time interval  $t = 0$  (Normal Non-Db group, **Fig. 2**) and in the loadings (PCs) from the PCA (**Fig. 3**) with their corresponding vibrational assignments of these peaks based on the recent literature.

| <b>Biomolecule class*</b> | <b>Mean spectrum (cm<sup>-1</sup>)</b> | <b>PC loading (cm<sup>-1</sup>)</b>                  | <b>Suggested vibrational assignment</b>                      | <b>Main biochemical component</b>                     | <b>References</b> |
|---------------------------|----------------------------------------|------------------------------------------------------|--------------------------------------------------------------|-------------------------------------------------------|-------------------|
| Proteins and amino acids  | 534                                    | 529 (PC1), 516, 546 (PC2), 510 (PC3, PC6), 508 (PC5) | S–S stretching (disulfide bridge, gauche conformation)       | Proteins (keratin)                                    | [22-24]           |
|                           | 563                                    | 565 (PC1), 570 (PC3)                                 | S–S stretching (disulfide bridge, <i>trans</i> conformation) | Proteins [keratin(?)]                                 | [22]              |
|                           | 621                                    | 621 (PC1), 582 (PC6)                                 | Ring <i>breathing</i>                                        | Proteins (hydroxyproline/phenylalanine)               | [23,30]           |
|                           | 642                                    | 642 (PC1), 639 (PC4), 617 (PC5), 604, 665 (PC6)      | C–C ring vibration – side chain                              | Proteins [proline(?)/tyrosine/cysteine]               | [23,30]           |
|                           | 758                                    | 758 (PC1), 743, 753 (PC2), 749 (PC4, PC5)            | Indole ring breathing                                        | Proteins (tryptophan)                                 | [23,25,29]        |
|                           | 857                                    | 815, 854 (PC1), 828 (PC2), 814,                      | C–C stretching – ring                                        | Proteins (collagen – proline/hydroxyproline, keratin) | [21,24-27,29]     |

| Biomolecule class* | Mean spectrum (cm <sup>-1</sup> ) | PC loading (cm <sup>-1</sup> )                                   | Suggested vibrational assignment         | Main biochemical component                      | References    |
|--------------------|-----------------------------------|------------------------------------------------------------------|------------------------------------------|-------------------------------------------------|---------------|
|                    |                                   | 831, 857 (PC3), 859 (PC4), 856 (PC5)                             |                                          |                                                 |               |
|                    | 877                               | 877 (PC1), 908 (PC2), 878, 900 (PC3)                             | C–C stretching                           | Collagen [glycine/hydroxyproline/tryptophan(?)] | [21,23,25,26] |
|                    | 922                               | 922 (PC1), 908 (PC2), 921 (PC3)                                  | C–C ring vibration – side chain          | Collagen (proline), keratin                     | [21,23,26]    |
|                    | 938                               | 938, (PC1, PC3), 930, 986 (PC2), 991 (PC3), 930 (PC4), 937 (PC6) | C–C stretching (backbone skeletal chain) | Collagen (proline/hydroxyproline)               | [21,26,27,29] |
|                    | 1004                              | 1003 (PC1, PC2, PC6), 1002 (PC4), 1006 (PC5)                     | Aromatic ring breathing                  | Proteins (phenylalanine/tryptophan, keratin)    | [21,26,29,30] |
|                    | 1032                              | 1032, 1046 (PC1), 1034 (PC3), 1028 (PC4)                         | In-plane C–H stretching – aromatic ring  | Proteins [phenylalanine/proline(?)]             | [21,30]       |

| Biomolecule class* | Mean spectrum (cm <sup>-1</sup> ) | PC loading (cm <sup>-1</sup> )                                         | Suggested vibrational assignment                                         | Main biochemical component                                               | References    |
|--------------------|-----------------------------------|------------------------------------------------------------------------|--------------------------------------------------------------------------|--------------------------------------------------------------------------|---------------|
|                    | 1100                              | 1134 (PC2)                                                             | (?)                                                                      | Protein [elastin/collagen, keratin(?)]                                   | [26]          |
|                    | 1177                              | 1176 (PC1),<br>1173 (PC3)                                              | Vibration (side-chain)                                                   | Proteins<br>(hydroxyproline/tyrosine)                                    | [21,25,26]    |
|                    | 1210                              | 1210 (PC1)                                                             | C–C stretching – side chain coupled to aromatic ring                     | Proteins (phenylalanine)                                                 | [21,26,30]    |
|                    | 1249                              | 1252 (PC1),<br>1227 (PC2),<br>1246 (PC3),<br>1232 (PC4),<br>1230 (PC6) | Amide III ( <i>random coil/β-sheet</i> )                                 | Proteins                                                                 | [21,23,25,29] |
|                    | 1271                              | 1271, 1300 (PC1), 1286 (PC2), 1277 (PC3), 1268 (PC5), 1298 (PC6)       | Amide III ( <i>α-helix</i> )                                             | Proteins                                                                 | [21,23,26,29] |
|                    | 1318                              | 1340 (PC2),<br>1330 (PC3),<br>1234 (PC4),<br>1345 (PC4,<br>PC5)        | C–H deformation ( <i>rocking</i> )                                       | Structural proteins (collagen I/collagen III/elastin), glycine           | [21,26,27]    |
|                    | 1341                              | 1343 (PC1),<br>1350 (PC2)                                              | CH <sub>2</sub> deformation ( <i>wagging</i> ); ring vibration (proline) | Structural proteins (collagen III/elastin), proline, tryptophan, glycine | [21,26,27,29] |

| Biomolecule class*       | Mean spectrum (cm <sup>-1</sup> ) | PC loading (cm <sup>-1</sup> )                                         | Suggested vibrational assignment                                                                       | Main biochemical component                                       | References       |
|--------------------------|-----------------------------------|------------------------------------------------------------------------|--------------------------------------------------------------------------------------------------------|------------------------------------------------------------------|------------------|
|                          | 1427                              | 1412 (PC2)                                                             | CH <sub>2</sub> (aliphatic side chain) & CH <sub>3</sub> deformations                                  | Overlap between lipid and protein signals (including tryptophan) | [23]             |
|                          | 1452                              | 1452 (PC1)                                                             | CH <sub>2</sub> deformation – <i>scissoring</i> & CH <sub>3</sub> – <i>bending</i>                     | Proteins (aliphatic side chains); keratin                        | [21,29]          |
|                          | 1557                              | 1557 (PC1)                                                             | Amide II / indole ring vibrations                                                                      | Proteins (tryptophan)                                            | [27,29]          |
|                          | 1609                              | 1607 (PC1)                                                             | C=C stretching (aromatic ring)                                                                         | Collagen (phenylalanine)                                         | [27,29,30]       |
|                          | 1659                              | 1659 (PC1, PC3, PC4),<br>1614 (PC2),<br>1648 (PC6)                     | C=O stretching of peptide backbone – Amide I ( <i>α-helix</i> )                                        | Proteins                                                         | [21,27,29]       |
| Lipids and phospholipids | 723                               | 721 (PC1),<br>734 (PC6)                                                | Symmetric N+(CH <sub>3</sub> ) <sub>3</sub> stretching – choline; steroid ring breathing – cholesterol | Phospholipids (choline headgroup); cholesterol (stratum corneum) | [23,28]          |
|                          | 1063                              | 1063 (PC1),<br>1067 (PC2)                                              | C–C stretching ( <i>trans</i> )                                                                        | Saturated lipids (including ceramide)                            | [21,25,29,31]    |
|                          | 1087                              | 1084 (PC1),<br>1079 (PC3)                                              | C–C stretching – acyl segment ( <i>trans</i> conformation); P–O stretching                             | Unsaturated lipids; phospholipids                                | [25,29,31]       |
|                          | 1127                              | 1127 (PC1),<br>1128 (PC2),<br>1118 (PC3),<br>1144 (PC5),<br>1134 (PC6) | C–C stretching                                                                                         | Saturated lipids (including ceramide)                            | [21,23,24,28-31] |

| <b>Biomolecule class*</b> | <b>Mean spectrum (cm<sup>-1</sup>)</b> | <b>PC loading (cm<sup>-1</sup>)</b>                                                | <b>Suggested vibrational assignment</b>                                                        | <b>Main biochemical component</b>                                                                   | <b>References</b> |
|---------------------------|----------------------------------------|------------------------------------------------------------------------------------|------------------------------------------------------------------------------------------------|-----------------------------------------------------------------------------------------------------|-------------------|
|                           | 1271                                   | 1172 (PC2)                                                                         | =CH deformation                                                                                | Unsaturated lipids (appears together with the band at 1659 cm <sup>-1</sup> )                       | [23,26,29,31]     |
|                           | 1302                                   | 1317, 1272 (PC2), 1306 (PC3), 1420 (PC4)                                           | CH <sub>2</sub> deformation ( <i>twisting/wagging</i> )                                        | Lipids (including ceramide) – narrow peak in saturated lipids (due to greater chain order)          | [23,24,29,31]     |
|                           | 1444                                   | 1443, 1452 (PC1), 1438 (PC2), 1364, 1416, 1438 (PC3), 1452 (PC4), 1389, 1450 (PC5) | CH <sub>2</sub> /CH <sub>3</sub> deformation                                                   | Lipids (including ceramide); cholesterol (stratum corneum)                                          | [21,23,24,29, 31] |
|                           | 1659                                   | 1659 (PC1, PC3, PC4), 1471 (PC3)                                                   | C=C stretching; cholesterol vibration                                                          | Unsaturated lipids (appears with the band at 1271 cm <sup>-1</sup> ); cholesterol (stratum corneum) | [23,24,29,31]     |
| Nucleic acids             | ~550                                   | 593 (PC2)                                                                          | (?)                                                                                            | RNA (overlapped with proteins/keratin)                                                              | [23]              |
|                           | 723                                    | 721 (PC1)                                                                          | (?)                                                                                            | DNA/RNA (overlapped with proteins/lipids/phospholipids)                                             | [23]              |
|                           | ~780                                   | —                                                                                  | Pyrimidine ring breathing; PO <sub>2</sub> <sup>-</sup> stretching (very weak in the spectrum) | DNA/RNA (nucleic acid marker)                                                                       | [23,25,26,29]     |

| <b>Biomolecule class*</b>                | <b>Mean spectrum (cm<sup>-1</sup>)</b> | <b>PC loading (cm<sup>-1</sup>)</b> | <b>Suggested vibrational assignment</b>                                                   | <b>Main biochemical component</b>                              | <b>References</b> |
|------------------------------------------|----------------------------------------|-------------------------------------|-------------------------------------------------------------------------------------------|----------------------------------------------------------------|-------------------|
|                                          | ~1230                                  | 1230 (PC6)                          | Asymmetric PO <sub>2</sub> <sup>-</sup> stretching (backbone) (very weak in the spectrum) | DNA/RNA (overlapped with proteins/lipids)                      | [29]              |
|                                          | ~1325                                  | 1358 (PC2)                          | Ring vibration (purine)                                                                   | DNA/RNA (overlapped with structural proteins/amino acids)      | [23,29]           |
| Other cellular components (mitochondria) | 756                                    | 758 (PC1)                           | Pyrrole ring breathing                                                                    | Cytochrome C                                                   | [26,29]           |
|                                          | 1127                                   | 1127 (PC1)                          | C–N stretching; pyrrole ring breathing – heme                                             | Cytochrome C                                                   | [29,30]           |
|                                          | 1302                                   | 1300 (PC1)                          | C–H deformation – heme                                                                    | Cytochrome C                                                   | [26,29]           |
|                                          | ~1580                                  | —                                   | Pyrrole ring breathing (C=C) – heme                                                       | Cytochrome C (overlapped with structural proteins/amino acids) | [29]              |

Amide I – C=O stretching and C–N stretching (to a lesser extent)

Amide II – C–N stretching, N–H deformation, and C=O stretching (to a lesser extent)

Amide III – C–N stretching and N–H deformation
